# Supplementary material for: Efficient Ammonia Production from Nitric Oxide under Real Condition Using Photo-Modulated Cu Single-Atom Catalysts
Source: Research Square preprint supplement (doi:10.21203/rs.3.rs-8346707/v1), 2025-12-23
Supplement: Supplementary file 1 [file c07de4f9611816c00a8e799b.docx]

**Supplementary Information**

**Efficient Ammonia Production from Nitric Oxide under Real Condition Using Photo-Modulated Cu Single-Atom Catalysts**

Xiaoyan Liu1,#, Zhuyu Luo1,#, Shan Hu1,#, Wanqi Tang2,#, Linfeng He1, Linwei Han1, Qing Wang1, Shuangjun Li1, Xinyun Wang1, Taoyuan Lu1, Guisheng Li1, Hexing Li1, Dieqing Zhang 1, *, Jun Lu2, *

1The Education Ministry Key Lab of Resource Chemistry, Joint International Research Laboratory of Resource Chemistry, Shanghai Key Laboratory of Rare Earth Functional Materials, Shanghai Frontiers Science Center of Biomimetic Catalysis, College of Chemistry and Materials Science, Shanghai Normal University, Shanghai 200234, P.R. China.

2College of Chemical and Biological Engineering, Zhejiang University, Hangzhou 310058, P.R. China.

#These authors contributed equally to this work.

*To whom correspondence should be addressed. Email: [dqzhang@shnu.edu.cn](mailto:dqzhang@shnu.edu.cn); [junzoelu@zju.edu.cn](mailto:junzoelu@zju.edu.cn)

**This material contains:**

1. **Supplementary Figures**
2. **Supplementary Tables**
3. **References**
4. **Supplementary Figures**


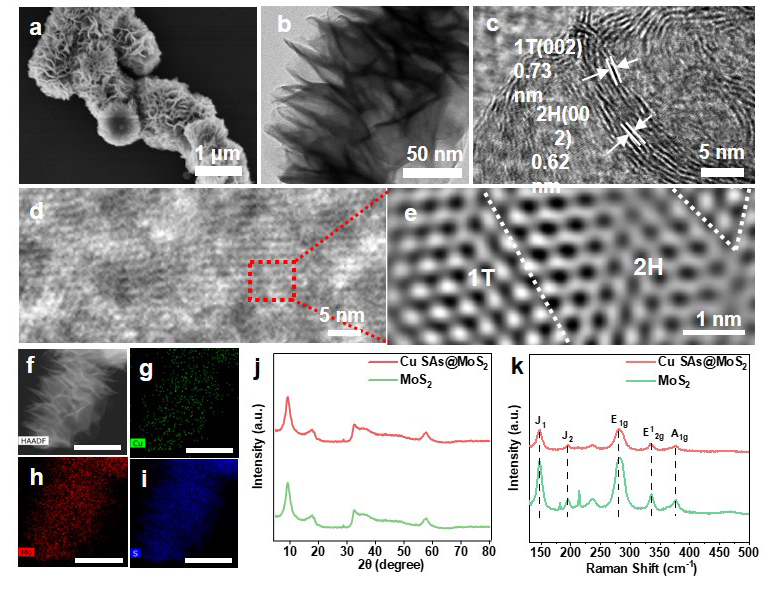


**Fig. S1.** (a) SEM image, (b-e) TEM images, (f-i) EDS elemental mapping images of Cu SAs@MoS2 (green, red and blue represent Cu, Mo, and S elements respectively, and scale bar 200 nm). (j) XRD patterns and (k) Raman spectra of MoS2 and Cu SAs@MoS2.


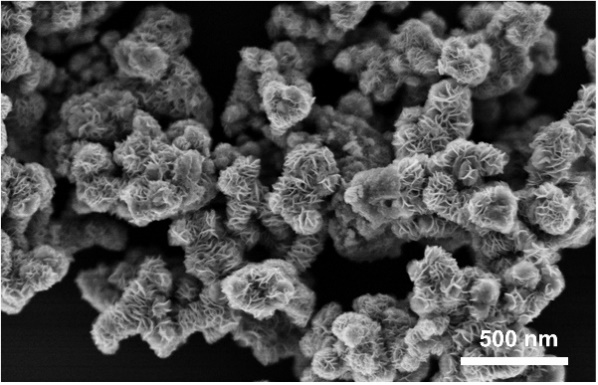


**Fig. S2.** SEM image of pure MoS2.

**
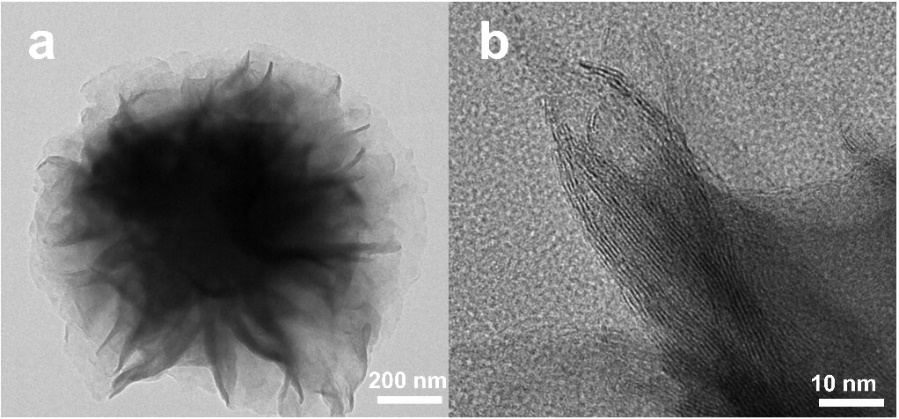
**

**Fig. S3.** TEM images of pure MoS2.

**
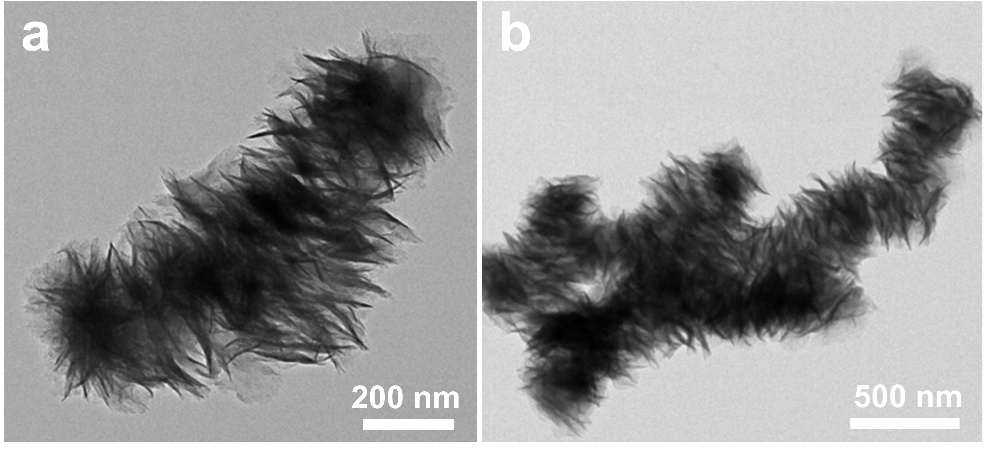
**

**Fig. S4.** TEM images of Cu SAs@MoS2.


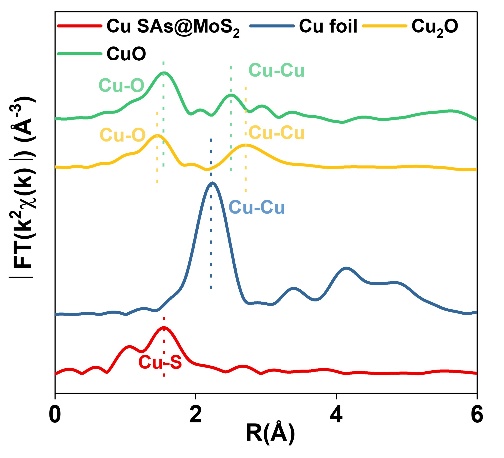


**Fig. S5.** k3-weighted Fourier-transform EXAFS spectra of Cu SAs@MoS2, Cu foil, Cu2O, and CuO samples under dark condition.


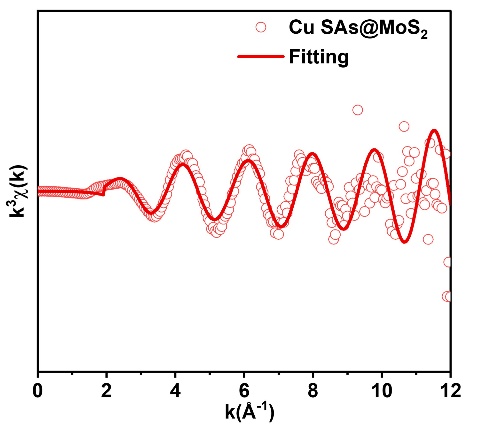


**Fig. S6.** The corresponding EXAFS k space fitting curves for Cu SAs@MoS2 under dark condition.


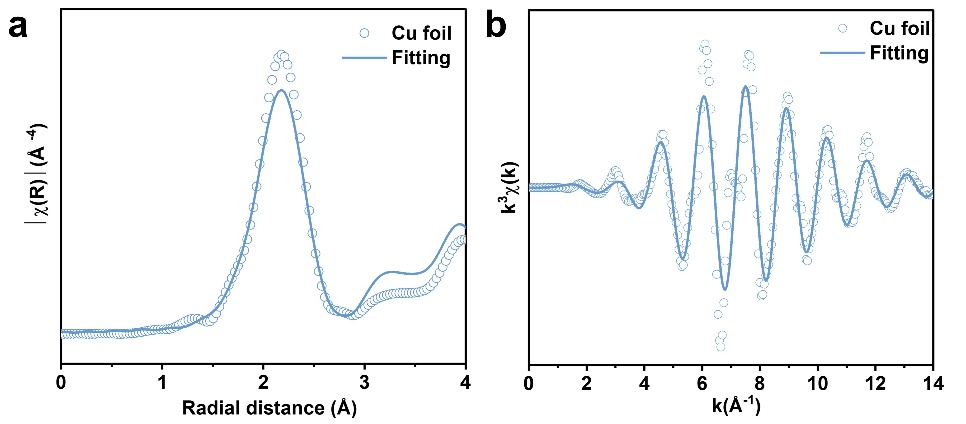


**Fig. S7.** (a, b) Corresponding EXAFS fitting curve and EXAFS k space fitting curves for Cu foil under dark condition.


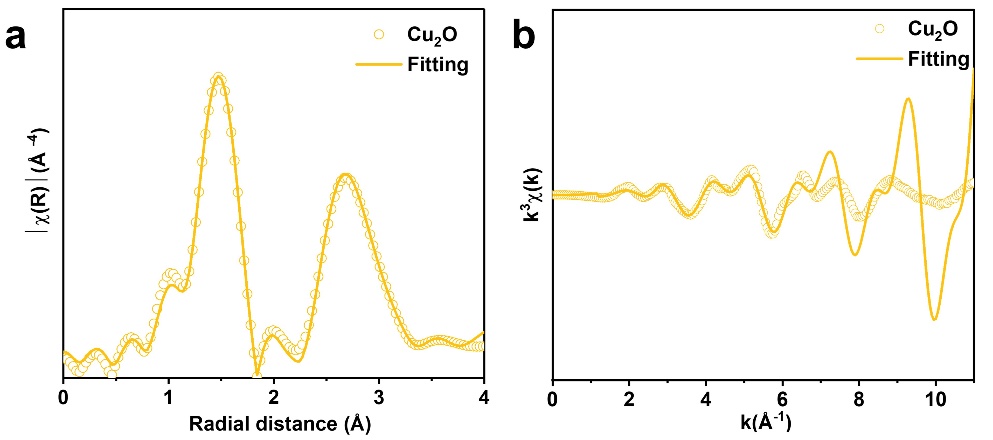


**Fig. S8.** (a, b) Corresponding EXAFS fitting curve and EXAFS k space fitting curves for Cu2O under dark condition.


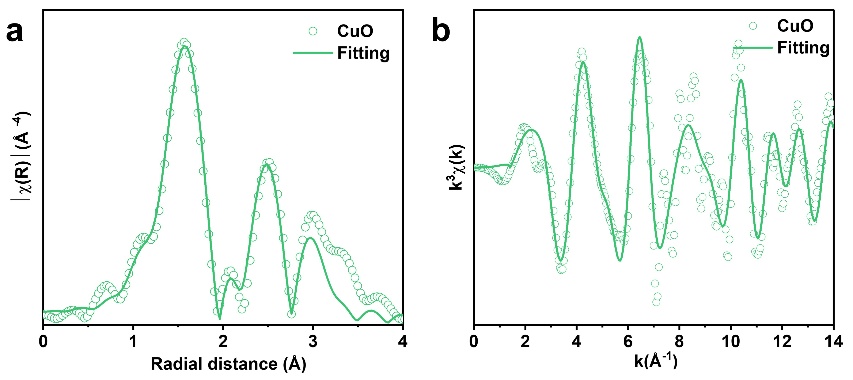


**Fig. S9.** (a, b) Corresponding EXAFS fitting curve and EXAFS k space fitting curves for CuO under dark condition.


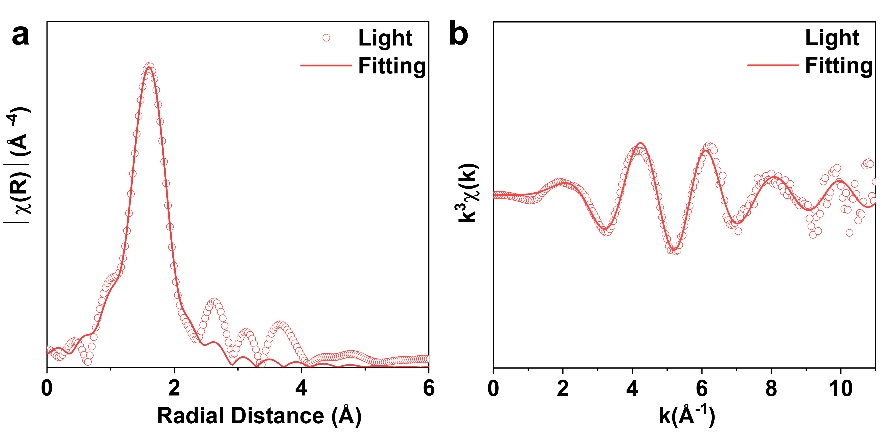


**Fig. S10.** (a, b) Corresponding *in situ* EXAFS fitting curve and *in situ* EXAFS k space fitting curves for Cu SAs@MoS2 under light irradiation.


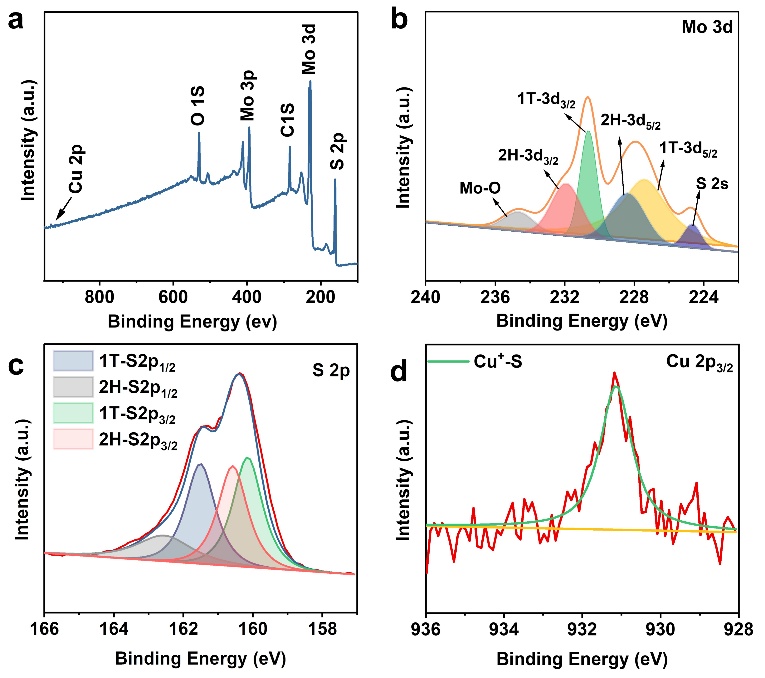


**Fig. S11.** (a) XPS full spectra of Cu SAs@MoS2, (b) Mo 3d spectra of Cu SAs@MoS2, (c) S 2p spectra of Cu SAs@MoS2, (d) Cu 2p3/2 spectra of Cu SAs@MoS2.


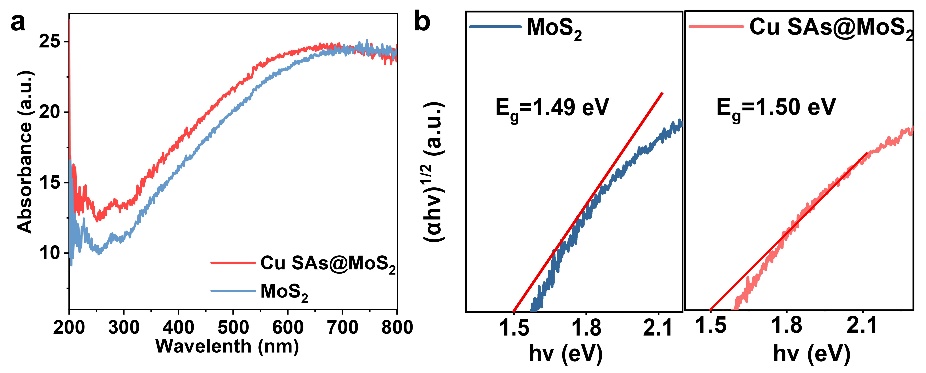


**Fig. S12.** (a) UV-vis spectra and of Cu SAs@MoS2 and (b) tauc plots of Cu SAs@MoS2 and MoS2, respectively.


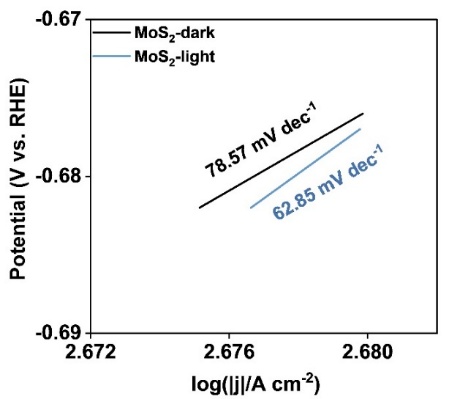


**Fig. S13.** Tafel slopes of MoS2 under dark and light conditions.

**
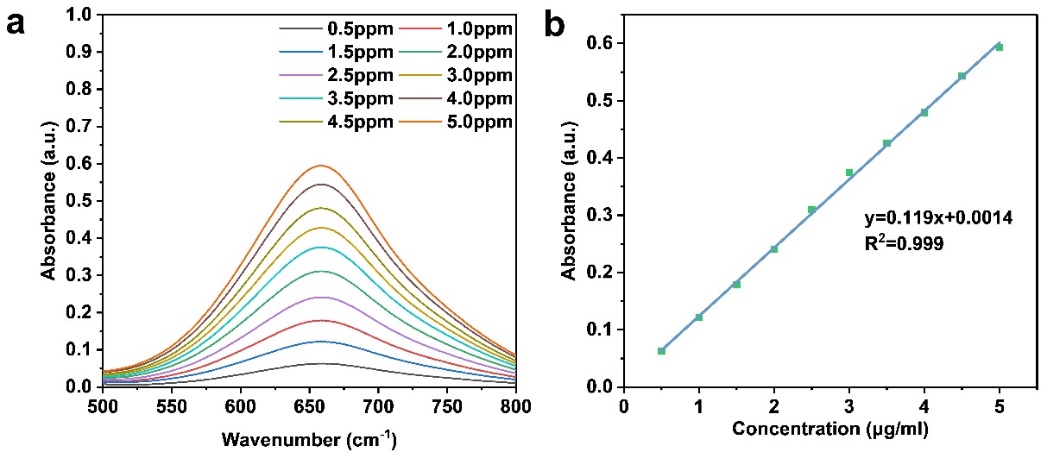
**

**Fig. S14.** (a) UV-Vis absorption spectra of indophenol assays with NH4+ after incubated for 2 h at room temperature. (b) Calibration curve used for estimation of NH4+ concentrations.


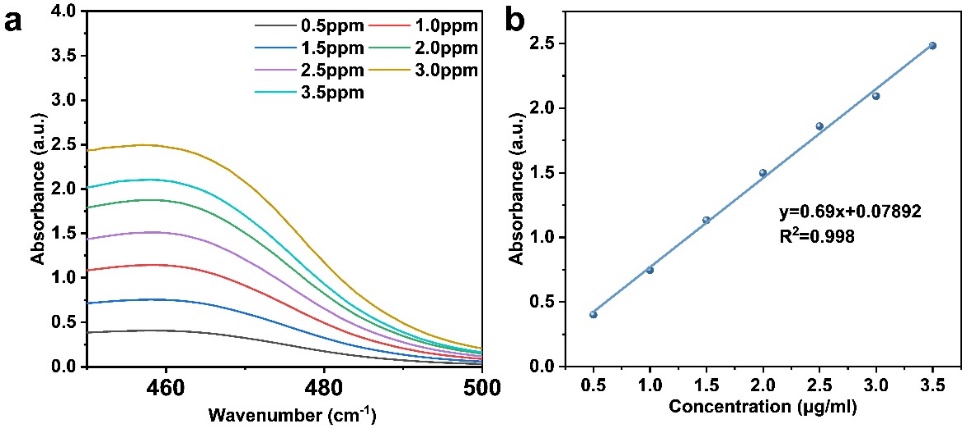


**Fig. S15.** (a) UV-Vis absorption spectra of various N2H4 concentrations after incubated for 15 min at room temperature. (b) Calibration curve used for quantification of N2H4 concentrations.


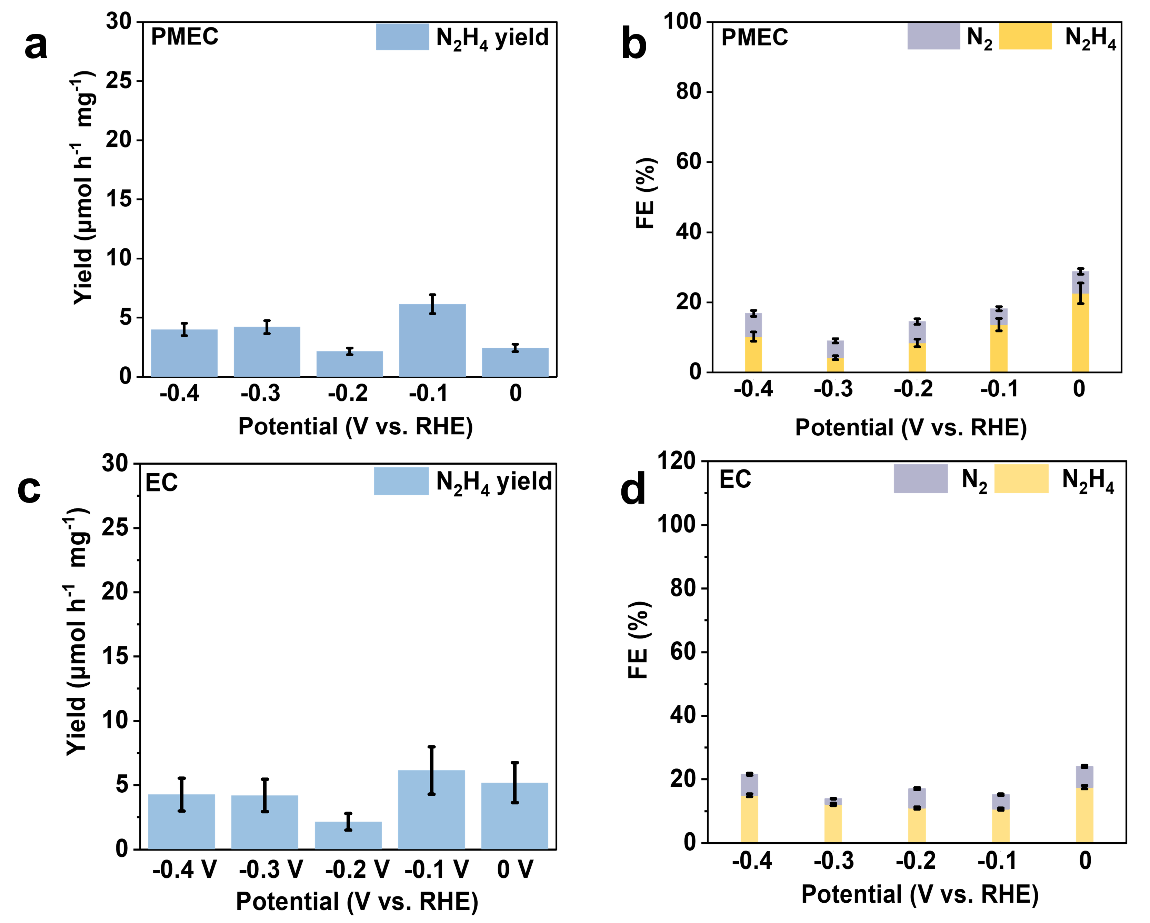


**Fig. S16.** N2H4 yield and FE of N2, N2H4 plots of PMEC and EC NORR of Cu SAs@MoS2.


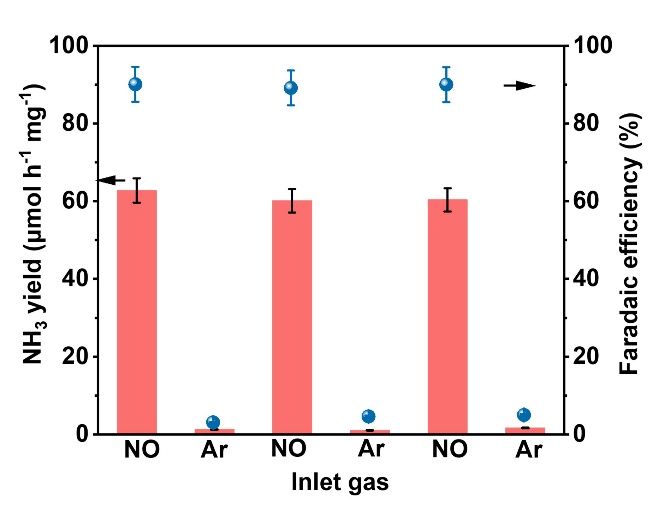


**Fig. S17.** The NH3 yield and corresponding FE under alternating conditions with or without NO in PMEC-NORR at -0.3 V vs. RHE.

**
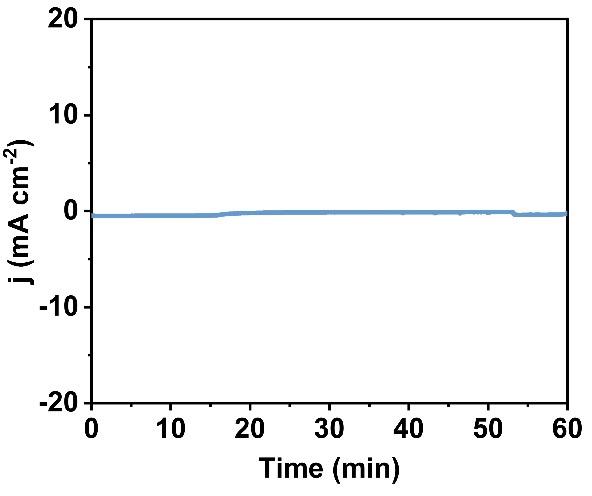
**

**Fig. S18.** The current density of Cu SAs@MoS2with Ar-saturated electrolyte at -0.3 V vs. RHE under light irradiation

**
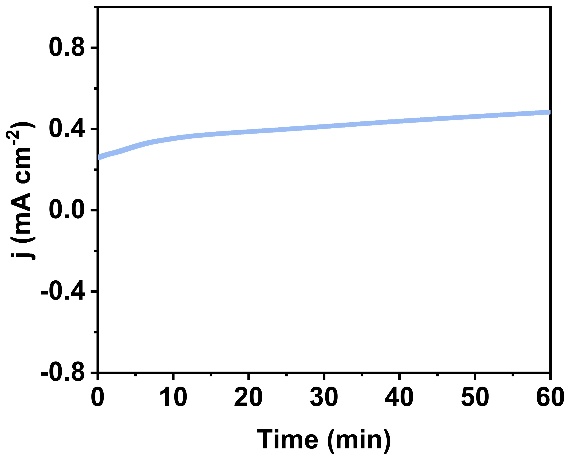
**

**Fig. S19.** The current density of Cu SAs@MoS2 with NO-saturated electrolyte at OCP (open circuit potential) without light irradiation.


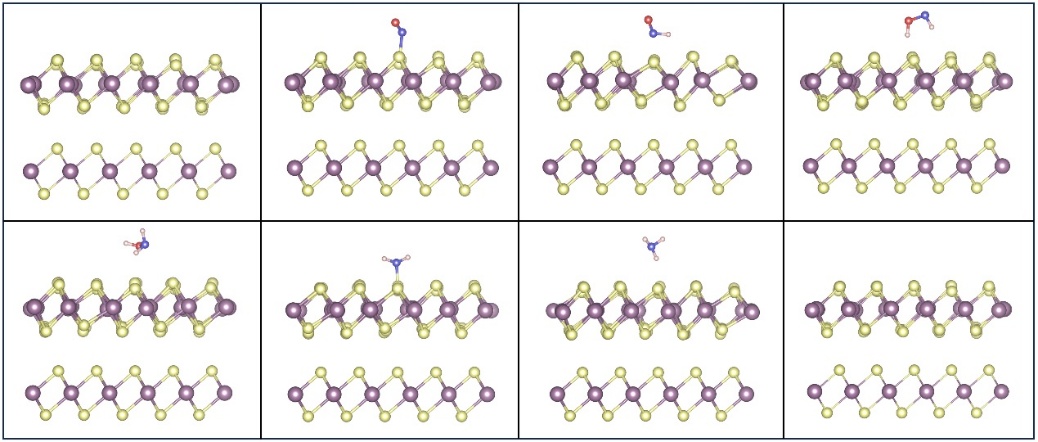


**Fig. S20.** Side views of optimized adsorption configurations for NO molecules on MoS2.


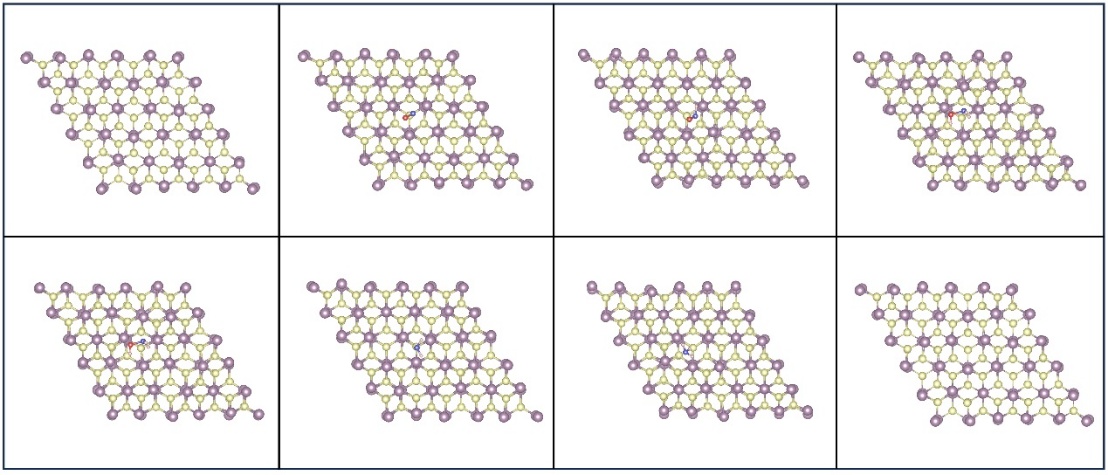


**Fig. S21.** Top views of optimized adsorption configurations for NO molecules on MoS2.


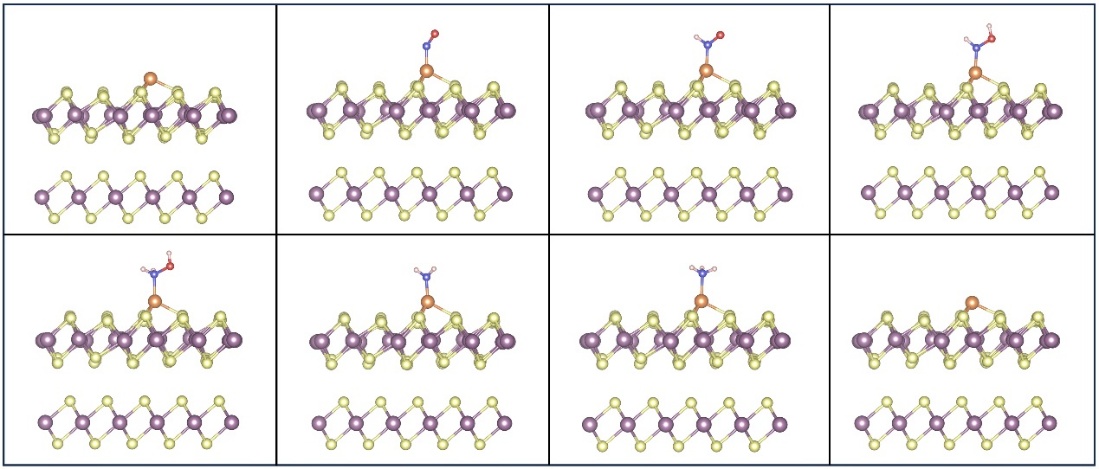


**Fig. S22.** Side views of optimized adsorption configurations for NO molecules on Cu SAs@MoS2.


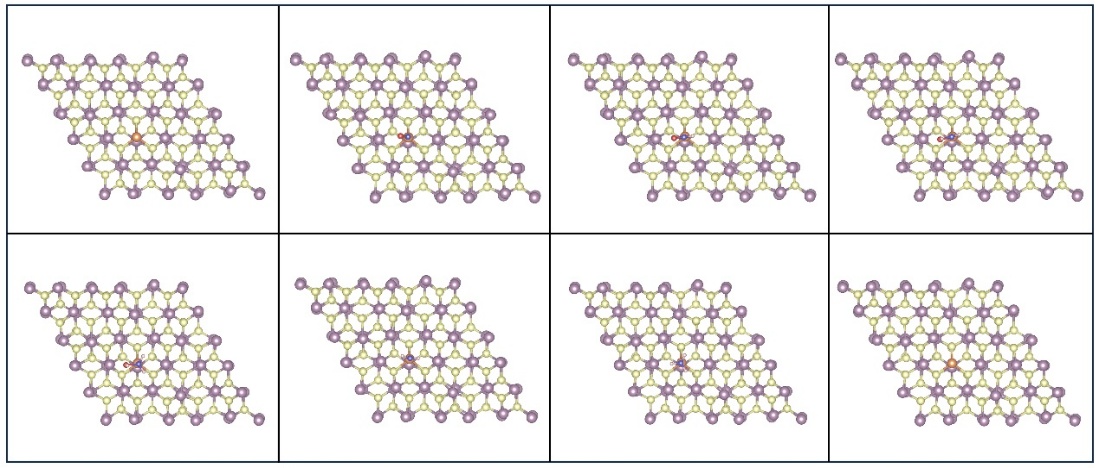


**Fig. S23.** Top views of optimized adsorption configurations for NO molecules on Cu SAs@MoS2.


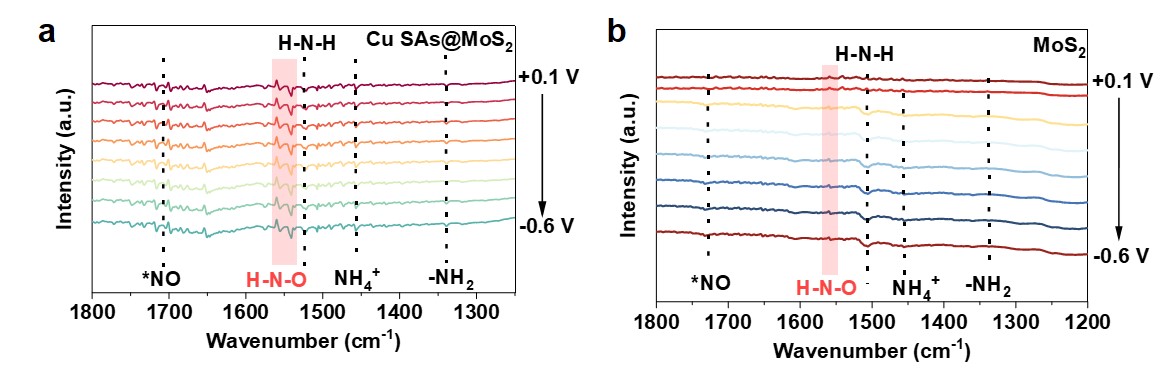


**Fig. S24.** Potential-dependent Operando ATR-FTIR spectra of PMEC-NORR over (a) Cu SAs@MoS2 and (b) MoS2.


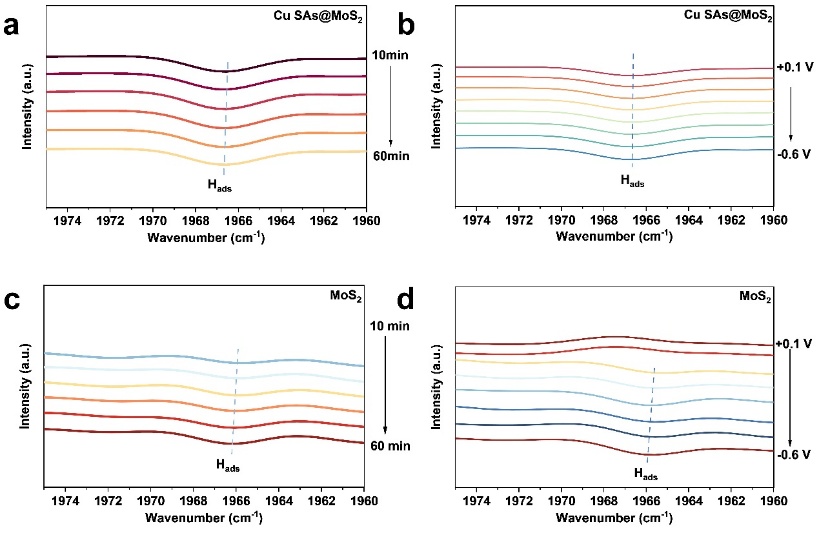


**Fig. S25.** (a) Potential-dependent and (b) time-dependent Operando photo-electrochemical ATR-FTIR spectra of PMEC-NORR over Cu SAs@MoS2. (c) Potential-dependent and (d) time-dependent Operando photo-electrochemical ATR-FTIR spectra of PMEC-NORR over MoS2.


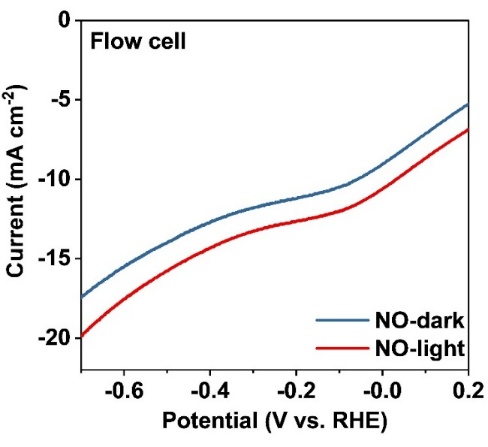


**Fig. S26.** LSV curves of Cu SAs@MoS2 with NO atmosphere under light and dark conditions in flow cell.


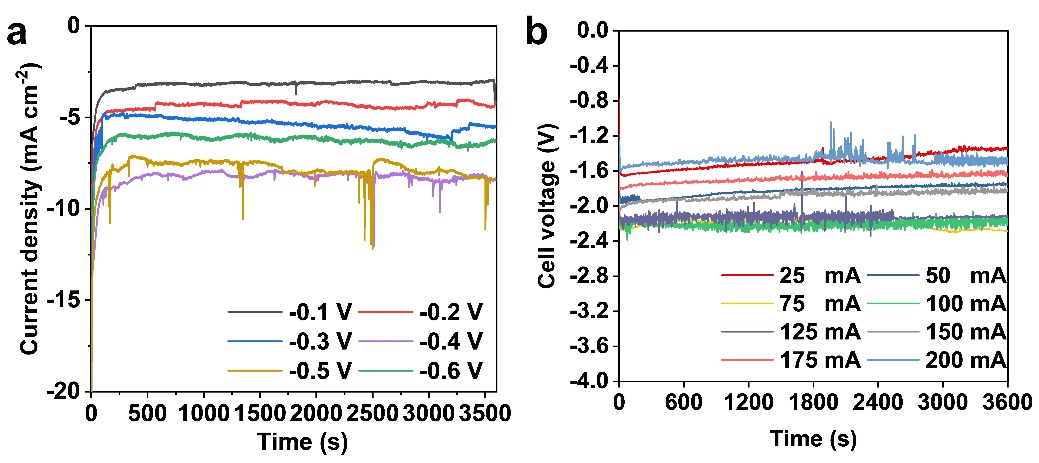


**Fig. S27.** (a) I-t curves under different potential, (b) V-t curves under different current density.

**
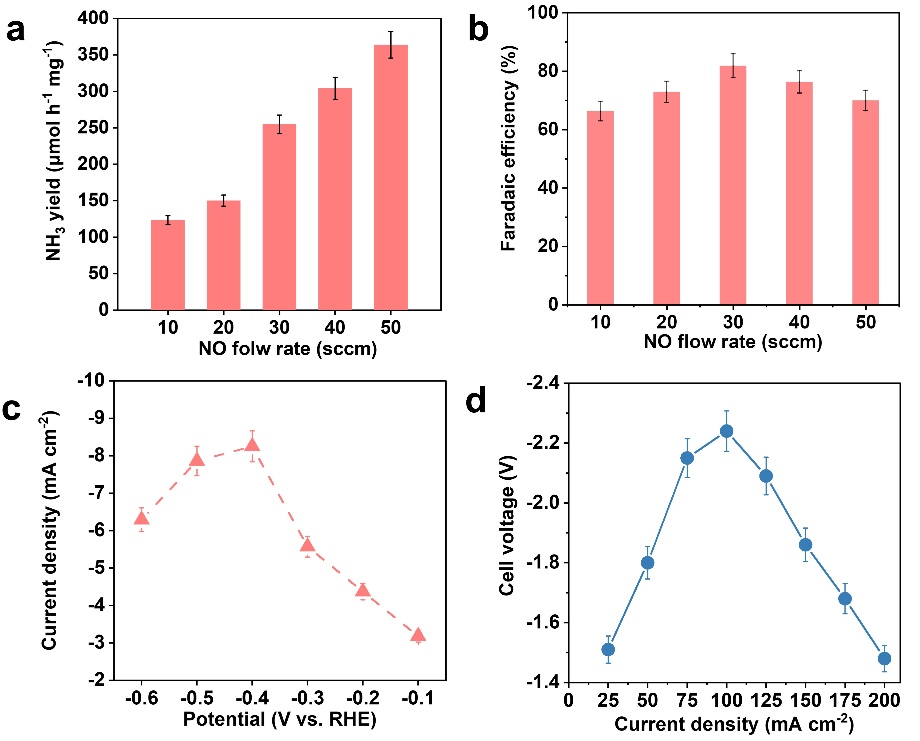
**

**Fig. S28.** (a, b) The experiment of gas flow rate was optimized. (c, d) Current density and cell voltage under different potential.

1. **Supplementary Tables**

**Table S1.** The Cu content of different samples.

| Sample | Cu content (wt%) |
| --- | --- |
| Cu SAs@MoS2 | 0.64 |

**Table S2.** EXAFS fitting parameters at the Cu K-edge various sample.

| Condition | Sample | | Path | CN | R(Å) | σ 2 (Å2) | R factor |
| --- | --- | --- | --- | --- | --- | --- | --- |
| Dark | Cu SAs@MoS2 | | Cu-S | 3 | 2.27 | 0.014 | 0.0085 |
| Light | Cu SAs@MoS2 | | Cu-S | 3 | 2.34 | 0.007 | 0.0141 |
| Dark | | Cu foil | Cu-Cu | 12 | 2.54 | 0.0086 | 0.0039 |
| CuO | Cu-Cu | 12 | 3.06 | 0.0032 | 0.0120 |
| Cu-O | 4 | 2.15 | 0.0013 |
| Cu2O | Cu-Cu | 12 | 3.03 | 0.0026 | 0.0166 |
| Cu-O | 4 | 1.85 | 0.0029 |

CN is the coordination number; R is the interatomic distance (the bond length between central atoms and surrounding coordination atoms); σ2 is the Debye-Waller factor (a measure of thermal and static disorder in absorber-scatter distances); ΔE0 is the edge-energy shift (the difference between the zero kinetic energy value of the sample and that of the theoretical model). R factor is used to value the goodness of the fitting.

**Table S3.** Comparison of NH3 yield and FENH3 of Cu SAs@MoS2 catalyst in our PMEC-NORR system with the reported EC-NORR system.

| Catalyst | NO concentration | Reactor type | NH3 Faradaic efficiency (%) | NH3 yield rate | Potential (V vs. RHE) /Current density (mA cm-2) | Ref. |
| --- | --- | --- | --- | --- | --- | --- |
| Ni2P | 10% | H-cell | 76.9% | 33.47 μmol h−1 mg−1 | -0.2 V | [1](#_ENREF_1) |
| HCNF/CP | 10% | 88.33% | 22.35 μmol h−1 cm−2 | -0.6 V | [2](#_ENREF_2) |
| MnO2-x NA/TM | 10% | 82.8% | 9.900 μmol h−1 cm−2 | -0.7 V | [3](#_ENREF_3) |
| MoS2/GF | 10% | 76.6% | 99.60 μmol h−1 cm−2 | -0.7 V | [4](#_ENREF_4) |
| a-B2.6C@TiO2/Ti | 10% | 87.6% | 147.0 μmol h−1 cm−2 | -0.9 V | [5](#_ENREF_5) |
| Cu@Co | 1% | 76.54% | 6.15 μmol h−1 mg−1 | -0.5 V | [6](#_ENREF_6) |
| FeOCl-VCl | 1% | 91.1% | 26.79 μmol h−1 cm−2 | -0.5 V | [7](#_ENREF_7) |
| hcp-RuCo | 1% | 99.2% | 4.570 μmol h−1 mg−1 | -0.1 V | [8](#_ENREF_8) |
| Agn | 1% | Flow-cell | ~100% | 28.00 μmol h−1 cm−2 | −0.165 V | [9](#_ENREF_9) |
| Cu@Cu/C NWAs | 3% | 85% | 244.5 μmol h−1 mg−1 | -0.5 V | [10](#_ENREF_10) |
| Fe/C | 10% | 50.40 | 2379 μmol h−1 mg−1 | -0.6 V | [11](#_ENREF_11) |
| **Cu SAs@MoS2** | **10%** | **Flow cell** | **86.53%** | **3228** μmol h−1 mg−1 | **100 mA cm-2** | This work |

3. References

1. Mou, T. et al. High-efficiency electrohydrogenation of nitric oxide to ammonia on a Ni2P nanoarray under ambient conditions. *J. Mater. Chem. A* **9**, 24268-24275 (2021).

2. Ouyang, L. et al. High-efficiency NO electroreduction to NH3 over honeycomb carbon nanofiber at ambient conditions. *J. Colloid Interface Sci.* **616**, 261-267 (2022).

3. Li, Z. et al. MnO2 Nanoarray with oxygen vacancies: An efficient catalyst for NO electroreduction to NH3 at ambient conditions. *Mater. Today Phys.* **22**, 100586 (2022).

4. Zhang, L. et al. High-performance electrochemical NO reduction into NH3 by MoS2 nanosheet. *Angew. Chem. Int. Ed.* **60**, 25263-25268 (2021).

5. Liang, J. et al. Amorphous boron carbide on titanium dioxide nanobelt arrays for high-efficiency electrocatalytic NO reduction to NH3. *Angew. Chem. Int. Ed.* **61**, e202202087 (2022).

6. Wu, Z. et al. Cu@Co with dilatation strain for high-performance electrocatalytic reduction of low-concentration nitric oxide. *Adv. Mater.* **36**, 2309470 (2024).

7. Guo, X. et al. Aqueous electroreduction of nitric oxide to ammonia at low concentration via vacancy engineered FeOCl. *Angew. Chem. Int. Ed.* **63**, e202318792 (2024).

8. Wang, D. et al. Ru-incorporation-induced phase transition in Co nanoparticles for low-concentration nitric oxide electroreduction to ammonia at low potential. *Adv. Mater.* **36**, 2408580 (2024).

9. Kim, D. et al. Unveiling electrode-electrolyte design-based NO reduction for NH3 synthesis. *ACS Energy Lett.* **5**, 3647-3656 (2020).

10. Meng, J. et al. Carbon support enhanced mass transfer and metal-support interaction promoted activation for low-concentrated nitric oxide electroreduction to ammonia. *J. Am. Chem. Soc.* **146**, 10044-10051 (2024).

11. Cheon, S. et al. Electro-synthesis of ammonia from dilute nitric oxide on a gas diffusion electrode. *ACS Energy Lett.* **7**, 958-965 (2022).
